## Dose-related Changes in the Rate of Cerebrospinal Fluid Formation and Resistance to Reabsorption of Cerebrospinal Fluid Following Administration of Thiopental, Midazolam, and Etomidate in Dogs

Alan A. Artru, M.D.\*

The rate of cerebrospinal fluid (CSF) formation ( $\dot{V}_f$ ) and resistance to reabsorption of CSF ( $R_a$ ) were determined in dogs at four doses of thiopental (6, 12, 18, and 24 mg · kg<sup>-1</sup> · h<sup>-1</sup>), midazolam (0.5, 1.0, 1.5, and 2.0 mg · kg<sup>-1</sup> · h<sup>-1</sup>), and etomidate (0.86, 1.72, 2.58, and 3.44 mg · kg<sup>-1</sup> · h<sup>-1</sup>). Results were compared within and between groups and to previously reported normal values for  $\dot{V}_f$  (0.030–0.054 ml/min) and  $R_a$  (220–240 cmH<sub>2</sub>O · ml<sup>-1</sup> · min) in dogs. At the two lower doses of thiopental, midazolam, or etomidate  $\dot{V}_f$  was not significantly different than previously reported normal values. At the two higher doses of each drug  $\dot{V}_f$  was 0.019–0.024 ml/min, significantly reduced compared to  $\dot{V}_f$  at the two lower doses of each drug. The pattern of  $R_a$  data was more varied. With thiopental  $R_a$  was elevated at the lowest dose, (354 ± 17 cmH<sub>2</sub>O · ml<sup>-1</sup> · min, mean ± SD) reduced at the highest dose (156 ± 19 cmH<sub>2</sub>O · ml<sup>-1</sup> · min), and not significantly different than previously reported normal values at the two intermediate doses. With midazolam  $R_a$  was elevated at the lowest and highest doses (332 ± 25 and 378 ± 18 cmH<sub>2</sub>O · ml<sup>-1</sup> · min) and normal at the two intermediate doses. With etomidate  $R_a$  was normal at the three lower doses and reduced at the highest dose (187 ± 13 cmH<sub>2</sub>O · ml<sup>-1</sup> · min). It is concluded that CSF volume may be increased and the CSF pressure at which CSF volume contracts may be increased by doses of thiopental or midazolam that increase  $R_a$ , but not increased by etomidate. (Key words: Anesthetics, intravenous; etomidate; midazolam; thiopental. Brain: intracranial pressure. Cerebrospinal fluid: formation; pressure; reabsorption. Hypnotics: etomidate; midazolam; thiopental.)

THE HYPNOTICS thiopental, midazolam, and etomidate are recommended as part of a balanced anesthetic technique for patients with increased intracranial pressure (ICP) or decreased intracranial compliance.<sup>1-3</sup> One factor in determining the suitability of these hypnotics for patients with increased ICP or decreased intracranial compliance is the effect of the drug on cerebrospinal fluid (CSF) dynamics, *i.e.*, the rate of CSF formation ( $\dot{V}_f$ ) and resistance to reabsorption of CSF ( $R_a$ ). Previously, there have been no reports on the effects of thiopental, midazolam, or etomidate on these variables.

$\dot{V}_f$  and  $R_a$  are important in patients with increased ICP or decreased intracranial compliance because they deter-

mine CSF volume, which, in turn, is one of the principal determinants of ICP. Increase of  $\dot{V}_f$  and/or  $R_a$  elevates ICP and opposes contraction of CSF volume in response to expansion of cerebral blood volume (CBV) or brain tissue volume. Conversely, decrease of  $\dot{V}_f$  and/or  $R_a$  lowers ICP and favors contraction of CSF volume in response to expansion of CBV or brain tissue volume. Preservation of normal  $\dot{V}_f$  and  $R_a$  does not change ICP and permits contraction of CSF volume in response to expansion of CBV or brain tissue volume.

The present studies were designed to determine the effects of thiopental, midazolam, or etomidate on  $\dot{V}_f$  and  $R_a$  in dogs. Four doses of each drug were examined to determine whether the effects varied with the amount of drug administered.

### Methods

#### ANIMAL PREPARATION

This study was approved by the Animal Care Committee of the University of Washington. Eighteen unmedicated mongrel dogs (15–22 kg) were studied. Anesthesia was induced with halothane (>1.2%, end-expired value determined intermittently by gas chromatography) and nitrous oxide (N<sub>2</sub>O, 66%, inspired) in oxygen. The trachea was intubated, expired CO<sub>2</sub> was continuously monitored (Beckman Medical Gas Analyzer, Model LB2, Beckman Instruments, Inc., Fullerton, California), and ventilation was regulated by a servo controller to maintain expired CO<sub>2</sub> at normocapnia. The right femoral artery was cannulated to permit arterial blood sampling for blood gas analysis and to permit continuous monitoring of systemic arterial pressure and heart rate. Mean arterial pressure (MAP) was determined by electronic integration. A urinary catheter was inserted, the right femoral vein was cannulated for saline and drug administration, and temperature was monitored by a nasopharyngeal thermistor probe. Intravenous infusion of vecuronium 2–4 mg/h maintained muscle relaxation.

The electroencephalogram (EEG) was recorded using bilateral frontoparietal electrodes and a Beckman Acutrace® polygraph (Beckman Instruments, Inc.) with a bandpass of 0.3–75 Hz. The EEG was recorded to eval-

\* Associate Professor of Anesthesiology.

Received from the Department of Anesthesiology, School of Medicine, University of Washington, Seattle, Washington. Accepted for publication April 29, 1988.

Address reprint requests to Dr. Artru: Department of Anesthesiology, RN-10, University of Washington School of Medicine, Seattle, WA 98195.

TABLE 1. Dose Regimens of Thiopental, Midazolam, and Etomidate

|                       | Initial Infusion<br>Given over<br>5-10 min<br>(mg/kg) | Subsequent Infusion<br>Rate (mg·kg <sup>-1</sup> ·h <sup>-1</sup> ) |
|-----------------------|-------------------------------------------------------|---------------------------------------------------------------------|
| Thiopental<br>(n = 6) | 6.0                                                   | 6.0                                                                 |
|                       | 6.0                                                   | 12.0                                                                |
|                       | 6.0                                                   | 18.0                                                                |
|                       | 6.0                                                   | 24.0                                                                |
| Midazolam<br>(n = 6)  | 1.6                                                   | 0.5                                                                 |
|                       | 1.6                                                   | 1.0                                                                 |
|                       | 1.6                                                   | 1.5                                                                 |
|                       | 1.6                                                   | 2.0                                                                 |
| Etomidate<br>(n = 6)  | 0.86                                                  | 0.86                                                                |
|                       | 0.86                                                  | 1.72                                                                |
|                       | 0.86                                                  | 2.58                                                                |
|                       | 0.86                                                  | 3.44                                                                |

uate the effects of thiopental, midazolam, and etomidate on cortical activity and to determine whether those effects remained constant throughout each infusion period. Electrodes were adjusted to maintain impedances between electrode pairs at <3 K $\Omega$ . Computer (Digital Equipment Corp. MINC-23<sup>®</sup>, Digital Equipment Corp., Marlboro, Massachusetts) analysis of the EEG was performed using a Compressed Spectral Array (CSA) program, which averaged the EEG power spectra of four epochs (1 epoch = 4 s) every 30 s.<sup>4,5</sup> Data from the CSA program were evaluated as the amount of EEG activity in the standard frequency bins: delta (1-4 Hz), theta (4-8 Hz), alpha (8-14 Hz), beta-1 (14-20 Hz), and beta-2 (20-32 Hz).

A burr hole was placed over the left hemisphere and a catheter was directed into the underlying lateral ventricle. The posterior neck muscles were surgically separated to expose the atlanto-occipital membrane, and a catheter was directed into the cisterna magna. A 0.3-ml sample of CSF was obtained from the cisternal cannula for measurement of osmolality using a Wescor Model 5100 B Vapor Pressor Osmometer (Wescor, Inc., Logan, UT). Mock CSF of matching osmolality was prepared by mixing standard solutions<sup>6</sup> (osmolality 290, 300, or 310 mosm/kg) labeled with blue dextran (1 mg/ml) (Sigma Chemical Co., St. Louis, Missouri). Wound edges were infiltrated with bupivacaine (0.5%) and the concentration of halothane was decreased (N<sub>2</sub>O unchanged) to 0.2% (end-expired value determined intermittently by gas chromatography). Details of this animal preparation have been previously reported.<sup>7,8</sup>

Mock CSF was infused into the ventricle, and the mixture of mock and native CSF was permitted to flow passively out of the cisterna magna through a short length of tubing attached to the cisternal cannula. The infusion rate ( $\dot{V}_i$ ) was controlled with a roller pump and gradually increased to 0.6 ml/min while ventricular CSF pressure was continuously monitored. The open end of the cister-

nal outflow tubing was placed at the same height as the CSF level present in the cisternal and ventricular cannula before perfusion was begun. This arrangement did not alter CSF pressure from the value normally occurring in the intact animal because the height of the open end of the outflow tubing determines CSF pressure during open ventriculocisternal perfusion. Successful ventriculocisternal perfusion was indicated by outflow of labeled CSF from the cisternal cannula with no increase in ventricular CSF pressure above preperfusion values. This initial period of open ventriculocisternal perfusion allowed for equilibration of labeled mock CSF with native CSF in the intracranial and cisternal CSF spaces of the dog. Details of this modified open ventriculocisternal perfusion technique have been previously reported.<sup>8,9</sup>

After 1 h of ventriculocisternal perfusion,  $\dot{V}_i$  was gradually reduced to 0.3 ml/min. Concentrations of blue dextran in cisternal outflow samples were determined intermittently using light absorbance at 620 nm on a Beckman DU-2 Spectrophotometer (Beckman Instruments, Inc.) (fitted with a Gilford absorbance indicator, Gilford Instrument Laboratories, Inc., Oberlin, Ohio). Equilibration of the tracer was considered complete when measured blue dextran concentrations in three consecutive samples of cisternal outflow (collection time = 4-6 min/sample) agreed within 2%.

#### EXPERIMENTAL PERIOD

The experimental period began once tracer equilibration was complete.  $\dot{V}_f$  and  $R_a$  were determined during thiopental, midazolam, or etomidate in six dogs each. For all three drugs each dog received four dose regimens iv of the drug (table 1). Within each drug group doses were given in sequence, progressing from smallest to largest dose. The duration at each infusion level was about 90 min and there were no intervals between infusions. Drug doses and infusion rates were based on previously reported data with the aim of achieving comparable and steady levels of depression of cerebral cortical activity during each infusion period.<sup>3,10-12</sup> At each dose of all three drugs dogs were studied at two CSF pressures (normal and elevated) so that  $R_a$  could be determined.

Normal CSF pressure was defined as that when the open end of the cisternal outflow tubing was placed at the same height as the CSF level present in the cisternal and ventricular cannula before perfusion was begun. Elevated CSF pressure was defined as CSF pressure when the open end of the cisternal outflow tubing was placed 10 cm above the level used for normal CSF pressure. The sequence of normal and elevated CSF pressures were altered within each group of six dogs so that six different combinations were employed over the four drug doses.

$\dot{V}_f$  and the rate of reabsorption of CSF ( $\dot{V}_a$ ) were de-

terminated at each of the eight conditions. At least 27 min (the first 17 min with  $\dot{V}_i = 0.6$  ml/min followed by at least 10 min with  $\dot{V}_i = 0.3$  ml/min) was allowed between conditions to permit reequilibration of the tracer. At each condition three consecutive samples of cisternal outflow were collected (collection time = 4–6 min/sample) for determinations of  $\dot{V}_f$ , and  $\dot{V}_a \cdot \dot{V}_f$  and  $\dot{V}_a$  were calculated as previously described<sup>9</sup> according to the formulas of Heisey *et al.*<sup>13</sup> For these calculations concentrations of blue dextran in samples of the labeled mock CSF being perfused into the ventricle also were determined using light absorbance at 620 nm. Values for  $\dot{V}_a$  at normal and elevated CSF pressures were used to calculate  $R_a$ . By definition  $R_a$  is a reciprocal measure of the slope relating  $\dot{V}_a$  (expressed as ml/min) to CSF pressure (expressed as cmH<sub>2</sub>O).<sup>14</sup> The EEG and systemic variables also were recorded at each experimental condition.

STATISTICAL ANALYSIS

Statistical comparisons within groups were made using repeated-measures analysis of variance (ANOVA), and comparisons between groups were made using one-way ANOVA.<sup>15</sup> Comparisons between the present groups and previously reported normal values for  $\dot{V}_f$  and  $R_a$  for dogs<sup>7,16–22</sup> were made using one-way ANOVA. Where the calculated *F* value exceeded the critical value for the 0.05 probability level, the Student-Newman-Keuls' test was used to determine which differences were significant at  $P < 0.05$ .<sup>23</sup> Values are tabulated as mean  $\pm$  SD.

Results

At the two lower doses of thiopental, midazolam, or etomidate  $\dot{V}_f$  was not significantly different than previously reported normal values (table 2; fig. 1). At the two higher doses of each drug  $\dot{V}_f$  decreased by 33%, 46%, and 39%, respectively, compared to the two lower doses of each drug.

$R_a$  during thiopental increased by 53% at the lowest dose, decreased by 33% at the highest dose, and was not different than previously reported normal values at the two intermediate doses (fig. 2).  $R_a$  during midazolam increased by 61% and 41% at the lowest and highest doses, respectively, and was normal at the two intermediate doses.  $R_a$  during etomidate was normal at the three lower doses and decreased by 21% at the highest dose.

In all groups  $\dot{V}_f$  was not different at elevated CSF pressure than at normal CSF pressure.  $\dot{V}_f$  at low drug doses was not different between groups and  $\dot{V}_f$  at high drug doses was not different between groups.  $R_a$  at intermediate drug doses also was not different between groups. In all groups CSF pressure increased by 10 cmH<sub>2</sub>O when the open end of the cisternal outflow tubing was placed 10 cm above the level used for normal CSF pressure.

TABLE 2. Cerebral Variables at Eight Experimental Conditions for the Three Treatment Groups

|                                                                 | Low Dose                 |                       | Low-intermediate Dose |                       | High-intermediate Dose |                       | High Dose           |                       |
|-----------------------------------------------------------------|--------------------------|-----------------------|-----------------------|-----------------------|------------------------|-----------------------|---------------------|-----------------------|
|                                                                 | Normal CSF Pressure      | Elevated CSF Pressure | Normal CSF Pressure   | Elevated CSF Pressure | Normal CSF Pressure    | Elevated CSF Pressure | Normal CSF Pressure | Elevated CSF Pressure |
|                                                                 | Thiopental group (n = 6) | 0.039 $\pm$ 0.011     | 0.033 $\pm$ 0.005     | 0.028 $\pm$ 0.006     | 0.029 $\pm$ 0.005      | 0.024 $\pm$ 0.004*    | 0.024 $\pm$ 0.005*  | 0.020 $\pm$ 0.007*    |
| $\dot{V}_f$ (ml $\cdot$ min <sup>-1</sup> )                     | 354 $\pm$ 17†            | 17.7 $\pm$ 0.9        | 239 $\pm$ 26          | 17.5 $\pm$ 1.3        | 225 $\pm$ 23           | 17.6 $\pm$ 1.0        | 156 $\pm$ 19*†      | 17.4 $\pm$ 1.3        |
| $R_a$ (cmH <sub>2</sub> O $\cdot$ ml <sup>-1</sup> $\cdot$ min) | 7.7 $\pm$ 0.9            | 17.7 $\pm$ 0.9        | 7.5 $\pm$ 1.3         | 17.5 $\pm$ 1.3        | 7.6 $\pm$ 1.0          | 17.6 $\pm$ 1.0        | 7.4 $\pm$ 1.3       | 17.4 $\pm$ 1.3        |
| CSF pressure, intraventricular (cmH <sub>2</sub> O)             |                          |                       |                       |                       |                        |                       |                     |                       |
| Midazolam group (n = 6)                                         | 0.040 $\pm$ 0.011        | 0.038 $\pm$ 0.007     | 0.035 $\pm$ 0.007     | 0.035 $\pm$ 0.004     | 0.021 $\pm$ 0.004*     | 0.019 $\pm$ 0.005*    | 0.020 $\pm$ 0.005*  | 0.019 $\pm$ 0.004*    |
| $\dot{V}_f$ (ml $\cdot$ min <sup>-1</sup> )                     | 378 $\pm$ 18†            | 18.0 $\pm$ 1.4        | 217 $\pm$ 23          | 18.0 $\pm$ 1.4        | 253 $\pm$ 17           | 18.5 $\pm$ 1.5        | 332 $\pm$ 25†       | 18.5 $\pm$ 1.5        |
| $R_a$ (cmH <sub>2</sub> O $\cdot$ ml <sup>-1</sup> $\cdot$ min) | 8.0 $\pm$ 1.4            | 18.0 $\pm$ 1.4        | 8.0 $\pm$ 1.4         | 18.0 $\pm$ 1.4        | 8.5 $\pm$ 1.5          | 18.5 $\pm$ 1.5        | 8.5 $\pm$ 1.5       | 18.5 $\pm$ 1.5        |
| CSF pressure, intraventricular (cmH <sub>2</sub> O)             |                          |                       |                       |                       |                        |                       |                     |                       |
| Etomidate group (n = 6)                                         | 0.041 $\pm$ 0.011        | 0.034 $\pm$ 0.005     | 0.031 $\pm$ 0.004     | 0.029 $\pm$ 0.005     | 0.022 $\pm$ 0.003*     | 0.020 $\pm$ 0.004*    | 0.021 $\pm$ 0.004*  | 0.019 $\pm$ 0.005*    |
| $\dot{V}_f$ (ml $\cdot$ min <sup>-1</sup> )                     | 237 $\pm$ 11             | 17.5 $\pm$ 1.6        | 249 $\pm$ 9           | 17.7 $\pm$ 1.6        | 229 $\pm$ 17           | 17.7 $\pm$ 1.6        | 187 $\pm$ 13*†      | 17.4 $\pm$ 1.3        |
| $R_a$ (cmH <sub>2</sub> O $\cdot$ ml <sup>-1</sup> $\cdot$ min) | 7.5 $\pm$ 1.6            | 17.5 $\pm$ 1.6        | 7.7 $\pm$ 1.6         | 17.7 $\pm$ 1.6        | 7.7 $\pm$ 1.6          | 17.7 $\pm$ 1.6        | 7.4 $\pm$ 1.3       | 17.4 $\pm$ 1.3        |
| CSF pressure, intraventricular (cmH <sub>2</sub> O)             |                          |                       |                       |                       |                        |                       |                     |                       |

Values are given as mean  $\pm$  SD.

\* Significant difference from low dose values,  $P < 0.05$ .

† Significant difference from intermediate dose values,  $P < 0.05$ .

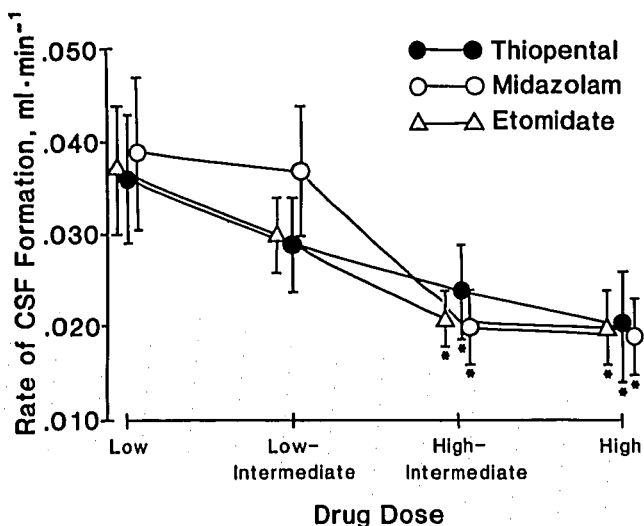

FIG. 1. Rates of CSF formation are shown for all four doses of thiopental (solid circles), midazolam (open circles), and etomidate (open triangles). For each drug, rates of CSF formation at the two higher doses were less than rates of CSF formation at the two lower doses;  $*P < 0.05$ . Previously reported normal values for  $\dot{V}_f$  range from  $0.30 \pm 0.11$  to  $0.54 \pm 0.10$   $\text{ml} \cdot \text{min}^{-1}$  (mean  $\pm$  SD) for dogs.<sup>7,16-22</sup>

With thiopental the EEG showed loss of high frequency activity and a decrease of theta, alpha, and beta-1 activity that decreased as the dose of thiopental was increased. With midazolam the EEG showed loss of high frequency activity and either continued moderate theta and alpha activity or variable, alternating periods of minimal and

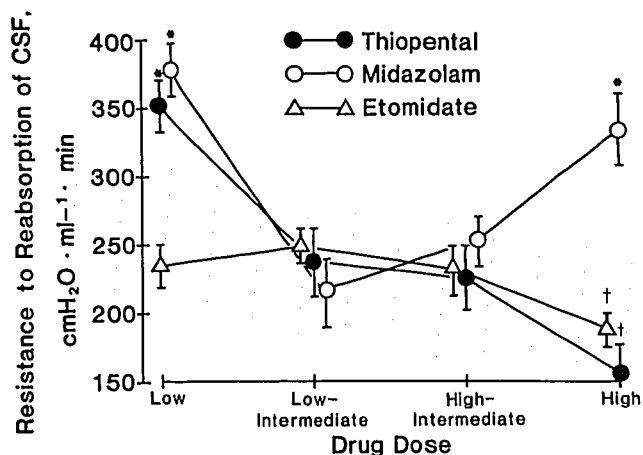

FIG. 2. Resistance to reabsorption of CSF is shown for all four doses of thiopental (solid circles), midazolam (open circles), and etomidate (open triangles). Compared to resistance values at the two intermediate doses, resistance to reabsorption of CSF was increased at the lowest doses of thiopental and midazolam and at the highest dose of midazolam ( $*P < 0.05$ ), and decreased at the lowest doses of thiopental and etomidate ( $\dagger P < 0.05$ ). Previously reported normal values for  $R_a$  range from  $\sim 220$  to  $240 \pm 5$   $\text{cmH}_2\text{O} \cdot \text{ml}^{-1} \cdot \text{min}$  (mean  $\pm$  SD) for dogs.<sup>21,22,24,25</sup>

moderate theta and alpha activity. With etomidate the EEG showed prominent theta, alpha, and beta-1 activity that increased as the dose of etomidate was increased. At all four rates of infusion of the three drugs the pattern of EEG activity characteristic of each dose remained constant throughout each infusion period.

Within each treatment group systemic variables were not significantly different between conditions. Systemic variables were therefore combined within groups (table 3). Combined systemic variables did not differ between treatment groups, although a trend toward lower heart rate values was observed with etomidate.

### Discussion

In previous studies of CSF dynamics control or normal values for  $\dot{V}_f$  and  $R_a$  were determined during inhalation of  $\text{N}_2\text{O}$  and low concentrations of volatile anesthetic or administration of pentobarbital.<sup>7,9,16-21,24-32,\dagger</sup> The reported range of control or normal values for  $\dot{V}_f$  was  $0.030 \pm 0.011$  to  $0.054 \pm 0.010$   $\text{ml}/\text{min}$  (mean  $\pm$  SD) for dogs.<sup>7,16-22</sup> Assuming that  $0.030$ – $0.054$   $\text{ml}/\text{min}$  represents normal canine  $\dot{V}_f$ , the results of the present study indicate that  $\dot{V}_f$  is unchanged at the two lower doses of thiopental, midazolam, or etomidate and is reduced at the two higher doses of each drug.

The reported range of control or normal values for  $R_a$  for dogs is  $\sim 220$ – $240 \pm 5$   $\text{cmH}_2\text{O} \cdot \text{ml}^{-1} \cdot \text{min}$ .<sup>21,22,24,25</sup> Assuming that  $220$ – $240$   $\text{cmH}_2\text{O} \cdot \text{ml}^{-1} \cdot \text{min}$  represents normal canine  $R_a$ , the results of the present study indicate that  $R_a$  is elevated at the lowest dose of thiopental, unchanged at the intermediate doses, and reduced at the highest dose. With midazolam  $R_a$  is elevated at the lowest and highest doses and unchanged at the intermediate doses. With etomidate  $R_a$  is reduced at the highest dose and unchanged at the other three doses.

It should be noted that in the present studies the sequence of administration of thiopental, midazolam, and etomidate always proceeded from lowest dose to highest dose. Consequently, it is possible that the reduction of  $\dot{V}_f$  observed with the two higher doses of each drug occurred because of time-related changes rather than drug effect. However, previous studies with this model reported no time-related change in  $\dot{V}_f$  during inhalation of  $\text{N}_2\text{O}$  and low concentrations of halothane<sup>7,17,18,21</sup> (the "background" anesthetic used here), inhalation of 1 MAC halothane,<sup>17,18</sup> or inhalation of  $\text{N}_2\text{O}$  and low concentrations of halothane combined with iv infusion of fentanyl.<sup>17,18</sup> Thus, it seems likely that the reduction of  $\dot{V}_f$

<sup>†</sup> VanLandingham KE, Maffeo CJ, Jackson H, Butler AB: Cerebrospinal fluid dynamics in the cat under halothane and pentobarbital anesthesia. Abstracts of Scientific Papers, Annual Meeting of the Society for Neuroscience, 1981, p 89.

TABLE 3. Combined Systemic Variables from Eight Experimental Conditions and CSF Osmolality for the Three Treatment Groups

| Systemic Variables                        | Thiopental Group<br>(n = 6) | Midazolam Group<br>(n = 6) | Etomidate Group<br>(n = 6) |
|-------------------------------------------|-----------------------------|----------------------------|----------------------------|
| PaO <sub>2</sub> (mmHg)                   | 133 ± 11                    | 141 ± 10                   | 145 ± 13                   |
| PaCO <sub>2</sub> (mmHg)                  | 35 ± 3                      | 36 ± 3                     | 34 ± 2                     |
| pH                                        | 7.39 ± 0.03                 | 7.40 ± 0.02                | 7.37 ± 0.03                |
| Bicarbonate (mEq · l <sup>-1</sup> )      | 21.1 ± 1.4                  | 21.8 ± 1.2                 | 19.4 ± 1.8                 |
| Hemoglobin (g · dl <sup>-1</sup> )        | 14.8 ± 2.4                  | 12.1 ± 2.0                 | 14.0 ± 1.3                 |
| Mean arterial blood pressure (mmHg)       | 114 ± 6                     | 100 ± 9                    | 110 ± 8                    |
| Heart rate (beats · min <sup>-1</sup> )   | 112 ± 7                     | 98 ± 14                    | 80 ± 18                    |
| Temperature, nasopharyngeal (°C)          | 37.4 ± 0.6                  | 37.2 ± 0.4                 | 37.2 ± 0.4                 |
| CSF osmolality (mosm · kg <sup>-1</sup> ) | 293 ± 17                    | 296 ± 14                   | 298 ± 17                   |

Values are given as mean ± SD. Values are the combined results of

determinations made at four drug doses, each at normal and elevated (+10 cmH<sub>2</sub>O) CSF pressure.

observed in the present study with the two higher doses of thiopental, midazolam, and etomidate was not due solely to the effect of time of this model. Regarding R<sub>a</sub> no consistent pattern was observed at the highest dose of each drug in this study (elevation of R<sub>a</sub> with midazolam, reduction of R<sub>a</sub> with thiopental and etomidate). Thus, no time-related effect on R<sub>a</sub> is suggested. Because each drug was given in sequence, progressing from smallest to largest dose, the results at all but the lowest infusion rate include the influence of preceding drug doses.

About two-thirds of CSF formation occurs *via* energy-dependent, active transport processes and about one-third of CSF formation occurs *via* passive filtration.<sup>33,34</sup> The reduction of  $\dot{V}_f$  that occurred at the two higher doses of thiopental, midazolam, and etomidate in this study may be related to decrease of choroid plexus blood flow and/or metabolism. Some authors have reported that thiopental, midazolam, and etomidate decrease cerebral blood flow (CBF) and the cerebral metabolic rate for oxygen (CMRO<sub>2</sub>) in dogs.<sup>10,11,35</sup> Decrease of CBF reduces  $\dot{V}_f$ , presumably due to impaired delivery of water, ions, and the substrate needed for energy production for active transport processes at the choroid plexus.<sup>33,34</sup> Decrease of CBF also may reduce  $\dot{V}_f$  due to impaired delivery of water and ions to sites of passive filtration of CSF, *i.e.*, the choroid plexus and ependyma.<sup>34</sup> Decrease of CMRO<sub>2</sub> reduces  $\dot{V}_f$ , presumably due to a slowing in the rate of the energy-requiring processes necessary for active CSF formation.<sup>28,34,36</sup> It is also possible that these hypnotics reduce  $\dot{V}_f$  by direct action (not related to slowing of metabolism) to impair the activity of the catalytic enzymes or membrane pumps of the choroid plexus, or to decrease the permeability of membranes to water or ions at the choroid plexus or ependyma.<sup>34</sup>

The increase or reduction of R<sub>a</sub> that occurred in this study may result from changes in conductance at the arachnoid granulations or changes in the pressure gradient across the arachnoid granulations. Conductance at the arachnoid granulations is altered by changes in the

architecture of the one-way valves or changes in transport across the basement membrane.<sup>34</sup> The pressure gradient across the arachnoid granulations is altered by changes in cerebral venous pressure (sagittal sinus and lateral lacunae) and CSF pressure.<sup>37</sup> It is unlikely that changes in CSF pressure altered the pressure gradient across the arachnoid granulations in this study because CSF pressure was fixed at the value determined by the height of the distal end of the cisternal outflow tubing.

In summary, the principal findings of this study were that thiopental, midazolam, and etomidate caused no change in  $\dot{V}_f$  at the two lower doses and decreased  $\dot{V}_f$  at the two higher doses. R<sub>a</sub> was elevated at the lowest and highest dose of midazolam and at the highest dose of thiopental, and unchanged or decreased with etomidate. Drug-induced changes in  $\dot{V}_f$  and/or R<sub>a</sub> are of interest because the balance between  $\dot{V}_f$  and R<sub>a</sub> is a major determinant of CSF volume. The present results indicate that, under the conditions of this study, CSF volume should be increased at the lowest doses of midazolam and thiopental and may be increased at the highest dose of midazolam. CSF volume should be normal or decreased at the other doses of midazolam and thiopental and with all four doses of etomidate. Also, drug-induced changes in R<sub>a</sub> are of interest because R<sub>a</sub> is a major determinant of the response of CSF volume to changes in CBV and brain tissue volume. Increased R<sub>a</sub> should be disadvantageous when intracranial compliance is reduced because CSF volume can contract in response to increase of CBV or brain tissue volume only if CSF pressure rises. In contrast, unchanged or lowered R<sub>a</sub> should be advantageous because a rise in CSF pressure is not needed to permit CSF volume to contract.

## References

1. Lassen NA: Cerebral and spinal cord blood flow, Anesthesia and Neurosurgery. Edited by Cottrel JE, Turndorf H. St. Louis, C. V. Mosby, 1986, pp 1-21
2. Campkin TV, Turner JM: Intracranial, effects of anaesthetic

- agents, *Neurosurgical Anaesthesia and Intensive Care*. Edited by Campkin TV, Turner JM. London, Butterworth, 1980, pp 35-52
3. Reves JG, Fragen RJ, Vinik HR, Greenblatt DJ: Midazolam: Pharmacology and uses. *ANESTHESIOLOGY* 62:310-324, 1985
  4. Bickford RG, Brimm J, Berger L, Aung M: Application of compressed spectral array in clinical EEG, *Automation of Clinical Electroencephalography*. Edited by Kellaway P, Peterson I. New York, Raven Press, 1973, pp 55-64
  5. Levy WJ, Shapiro HM, Maruchak G, Meathe E: Automated EEG processing for intraoperative monitoring: A comparison of techniques. *ANESTHESIOLOGY* 53:223-236, 1980
  6. Davson H: Chemical composition and secretory nature of the fluids, *Physiology of the Cerebrospinal Fluid*. Edited by Davson H. London, Churchill, 1970, pp 33-54
  7. Artru AA, Hornbein TF: Closed ventriculocisternal perfusion to determine CSF production rate and pressure. *Am J Physiol* 251: R996-R999, 1986
  8. Artru AA: Effects of enflurane and isoflurane on resistance to reabsorption of cerebrospinal fluid in dogs. *ANESTHESIOLOGY* 61:529-533, 1984
  9. Artru AA, Hornbein TF: Prolonged hypocapnia does not alter the rate of CSF production in dogs during halothane anesthesia or sedation with nitrous oxide. *ANESTHESIOLOGY* 67:66-71, 1987
  10. Nugent M, Artru AA, Michenfelder JD: Cerebral metabolic, vascular and protective effects of midazolam maleate. *ANESTHESIOLOGY* 56:172-176, 1982
  11. Michenfelder JD: The interdependency of cerebral functional and metabolic effects following massive doses of thiopental in the dog. *ANESTHESIOLOGY* 41:231-236, 1974
  12. Milde LN, Milde JH: Preservation of cerebral metabolites by etomidate during incomplete cerebral ischemia in dogs. *ANESTHESIOLOGY* 65:272-277, 1986
  13. Heisey SR, Held D, Pappenheimer JR: Bulk flow and diffusion in the cerebrospinal fluid system of the goat. *Am J Physiol* 203: 775-781, 1962
  14. Pappenheimer JR, Heisey SR, Jordan EF, Downer J: Perfusion of the cerebral ventricular system in unanesthetized goats. *Am J Physiol* 203:763-774, 1962
  15. Brunning JL, Kintz BL: Analysis of variance, *Computational Handbook of Statistics*. Edited by Brunning JL, Kintz GL. Glenview, Scott, Foresman and Company, 1977, pp 18-106
  16. Artru AA, Nugent M, Michenfelder JD: Enflurane causes a prolonged and reversible increase in the rate of CSF production in the dog. *ANESTHESIOLOGY* 57:255-260, 1982
  17. Artru AA: Effects of halothane and fentanyl on the rate of CSF production in dogs. *Anesth Analg* 62:581-585, 1983
  18. Artru AA: Effects of halothane and fentanyl anesthesia on resistance to reabsorption of CSF. *J Neurosurg* 60:252-256, 1984
  19. Artru AA: Isoflurane does not increase the rate of CSF production in the dog. *ANESTHESIOLOGY* 60:193-197, 1984
  20. Artru AA: Effects of enflurane and isoflurane on resistance to reabsorption of CSF in dogs. *ANESTHESIOLOGY* 61:529-533, 1984
  21. Artru AA: Reduction of cerebrospinal fluid pressure by hypocapnia: Changes in cerebral blood volume, cerebrospinal fluid volume, and brain tissue water and electrolytes. *J Cereb Blood Flow Metab* 7:471-479, 1987
  22. Artru AA: Muscle relaxation with succinylcholine or vecuronium does not alter the rate of CSF production or resistance to reabsorption of CSF in dogs. *ANESTHESIOLOGY* 68:392-396, 1988
  23. Steel RGD, Torrie JH: Analysis of variance I: The one-way classification, *Principles and Procedures of Statistics*. Edited by Steel RGD, Torrie JH. New York, McGraw-Hill, 1960, pp 99-131
  24. Bering EA Jr, Sato O: Hydrocephalus: Changes in formation and absorption of cerebrospinal fluid within the cerebral ventricles. *J Neurosurg* 20:1050-1063, 1963
  25. Oppelt WW, Patlak CS, Rall DP: Effect of certain drugs on cerebrospinal fluid production in the dog. *Am J Physiol* 206:247-250, 1964
  26. Vogh BP, Godman DR: Addition of the effects of norepinephrine and acetazolamide to decrease formation of cerebrospinal fluid. *J Pharmacol Exp Ther* 229:207-209, 1984
  27. Vogh BP, Godman DR: Timolol plus acetazolamide: Effect on formation of cerebrospinal fluid in cats and rats. *Can J Physiol Pharmacol* 63:340-343, 1985
  28. Funstermacher JD, Li C, Levin VA: Extracellular space of the cerebral cortex of normothermic and hypothermic cats. *Exp Neurol* 27:101-114, 1970
  29. Broder LE, Oppelt WW: Effect of benzolamide on cerebrospinal fluid formation. *J Pharmacol Exp Ther* 169:271-276, 1969
  30. Oppelt WW, Palmer RF: Stimulation of cerebrospinal fluid production by low doses of intraventricular ouabain. *J Pharmacol Exp Ther* 154:581-585, 1966
  31. Mann JD, Butler AB, Rosenthal JE, Maffeo CJ, Johnson RN, Bass NH: Regulation of intracranial pressure in rat, dog, and man. *Ann Neurol* 3:156-165, 1978
  32. Vela AR, Carey ME, Thompson BM: Further data on the acute effect of intravenous steroids on canine CSF secretion and absorption. *J Neurosurg* 50:477-482, 1979
  33. Carey ME, Vela AR: Effect of systemic arterial hypotension on the rate of cerebrospinal fluid formation in dogs. *J Neurosurg* 41:350-355, 1974
  34. Wood JH: Physiology, pharmacology, and dynamics of cerebrospinal fluid, *Neurobiology of Cerebrospinal Fluid*. Edited by Wood JH. New York, Plenum Press, 1980, pp 1-16
  35. Milde LN, Milde JH, Michenfelder JD: Cerebral functional, metabolic, and hemodynamic effects of etomidate in dogs. *ANESTHESIOLOGY* 63:371-377, 1985
  36. Snodgrass SR, Lorenzo AV: Temperature and cerebrospinal fluid production rate. *Am J Physiol* 222:1524-1527, 1972
  37. Capra NF, Kapp JP: Anatomic and physiologic aspects of venous system, *Cerebral Blood Flow*. Edited by Wood JH. New York, McGraw-Hill, 1987, pp 37-58
